## RESEARCH ARTICLE

# A conserved transcriptional network regulates lamina development in the *Drosophila* visual system

Cristina Piñeiro<sup>\*,§</sup>, Carla S. Lopes<sup>‡,§</sup> and Fernando Casares<sup>¶</sup>

## ABSTRACT

The visual system of insects is a multilayered structure composed externally by the compound eye and internally by the three ganglia of the optic lobe: lamina, medulla and the lobula complex. The differentiation of lamina neurons depends heavily on Hedgehog (Hh) signaling, which is delivered by the incoming photoreceptor axons, and occurs in a wave-like fashion. Despite the primary role of lamina neurons in visual perception, it is still unclear how these neurons are specified from neuroepithelial (NE) progenitors. Here we show that a *homothorax* (*hth*)-*eyes absent* (*eya*)-*sine oculis* (*so*)-*dachshund* (*dac*) gene regulatory cassette is involved in this specification. Lamina neurons differentiate from NE progenitors that express *hth*, *eya* and *so*. One of the first events in the differentiation of lamina neurons is the upregulation of *dac* expression in response to Hh signaling. We show that this *dac* upregulation, which marks the transition from NE progenitors into lamina precursors, also requires *Eya/So*, the expression of which is locked in by mutual feedback. *dac* expression is crucial for lamina differentiation because it ensures repression of *hth*, a negative regulator of *single-minded*, and thus *dac* allows further lamina neuron differentiation. Therefore, the specification of lamina neurons is controlled by coupling the cell-autonomous *hth-eya-so-dac* regulatory cassette to Hh signaling.

**KEY WORDS:** Lamina precursor, *Drosophila*, *Homothorax*, *Eyes absent*, *Sine oculis*, Gene network, *Dachshund*

## INTRODUCTION

The insect visual system comprises two separate structures: the compound eye (often called ‘retina’), which contains the photoreceptors, and the underlying optic lobes (OLs), which are part of the brain hemispheres (Meinertzhagen and Hanson, 1993; Sanes and Zipursky, 2010). Despite their functional importance as primary visual processing centers, our knowledge of the genetic mechanisms that control the specification and early development of the *Drosophila* OLs is poor compared with the eye. In addition, knowledge gained in *Drosophila* might be of general importance for understanding the mechanisms that specify the vertebrate visual neuroepithelium (reviewed by Erclik et al., 2009; Sanes and Zipursky, 2010).

The compound eye is formed by ~800 ommatidia, or unit eyes. Each comprises six outer (R1–6) and two inner (R7 and R8) photoreceptor (PR) neurons, together with pigment and lens-secreting

cone cells. Outer PRs are in charge of motion and brightness detection and spatial vision, whereas inner PRs function as color, UV and polarized light sensors (Hardie, 1985). According to their differentiated function, R1–6 innervate the first OL neuropil, which is the lamina, whereas R7 and R8 axons run across the lamina to innervate the neuropil beneath, which is the medulla. Next, the lobula and lobula plate (together called the ‘lobula complex’) receive signals from medulla neurons and send projections to the higher-order visual centers of the brain (Meinertzhagen and Hanson, 1993; Sanes and Zipursky, 2010). This tetralayered organization is conserved within insects and shared with malacostracan crustaceans (Strausfeld, 2009).

The lamina, medulla and lobula complex are derived from the embryonic OL primordium (OP) (Green et al., 1993), which segregates into the outer and inner OL anlagen. After embryonic invagination, and during larval life, these two anlagen proliferate extensively and are termed the outer and inner proliferative centers (OPC and IPC), respectively. The OPC-derived neurons have their cell bodies in the lamina and medulla, whereas the IPC-derived neurons have their cell bodies mostly in the lobula complex (Hofbauer and Campos-Ortega, 1990; Meinertzhagen and Hanson, 1993).

During late third larval stage (late L3) the OPC neuroepithelium is characterized by densely packed cells expressing DE-cadherin (DE-cad; Shotgun – FlyBase) that give rise to medulla neuroblasts medially and to lamina neurons laterally (Egger et al., 2007). Neuroepithelial and lamina cells are separated by an indentation called the lamina furrow (LF) (Selleck and Steller, 1991; Meinertzhagen and Hanson, 1993). Lamina cells are characterized by the expression of the transcription factor *dachshund* (*dac*) (Mardon et al., 1994; Huang and Kunes, 1996). As cells exit the LF, they are contacted by incoming retinal PR axons in what is termed the preassembly domain (Umetsu et al., 2006). Hedgehog (Hh), delivered by PR axons, triggers the lamina differentiation program along with a final cell division (Selleck and Steller, 1991; Huang and Kunes, 1996; Huang et al., 1998). Next, lamina cells and PR axons reorganize and assemble into lamina columns (Meinertzhagen and Hanson, 1993), a process that requires the expression of the bHLH-PAS transcription factor *single-minded* (*sim*) (Umetsu et al., 2006).

In recent years, the mechanisms of specification and early development of the eye primordium have been extensively studied [reviewed by Amore and Casares (2010)], in contrast to other components of the visual system. Eye specification is dependent on the expression of two Pax6 genes, *twin of eyeless* (*toy*) and *eyeless* (*ey*), with *toy* being required for the initiation of *ey* expression (Halder et al., 1995; Czerny et al., 1999). Then, *ey*-expressing cells are maintained as proliferative and undifferentiated progenitors as long as they express the TALE class homeodomain gene *homothorax* (*hth*) (Bessa et al., 2002; Peng et al., 2009; Lopes and Casares, 2010). Repression of *hth* by Decapentaplegic (Dpp; *Drosophila* BMP2/4) allows the upregulation of a class of genes collectively known as retinal determination (RD) genes (Bessa et al., 2002; Lopes and Casares, 2010). These include *sine oculis*

CABD (Andalusian Centre for Developmental Biology), CSIC-UPO-JA, Seville 41013, Spain.

<sup>\*</sup>Present address: Max Planck Institute for Developmental Biology, Tübingen 72076, Germany. <sup>‡</sup>Present address: IBMC, Universidade do Porto, Oporto 4150-180, Portugal.

<sup>§</sup>These authors contributed equally to this work

<sup>¶</sup>Author for correspondence (fcasfer@upo.es)

Received 4 February 2014; Accepted 13 May 2014

(*so*), a Six2-type homeodomain transcription factor, its partner *eyes absent* (*eya*), and the transcription factor *dac* (Silver and Rebay, 2005). The RD genes, which also include the Zn-finger genes *teashirt* (*tsh*) and *tiptop* (*tio*), are knitted together in the RD gene regulatory network that, through extensive feedbacks, locks in the eye fate [reviewed by Kumar (2010)].

RD genes are also expressed in the OLs. However, their putative role during development has remained elusive. The RD genes *so* and *eya* are expressed in the embryonic OP, where they are required for its invagination (Cheyette et al., 1994; Serikaku and O'Tousa, 1994; Bonini et al., 1998; Daniel et al., 1999). After OP invagination, transcription of *so* and *eya* is reinitiated only during late larval stages (Cheyette et al., 1994; Serikaku and O'Tousa, 1994; Bonini et al., 1998). In addition to small or absent eyes, *so* and *eya* alleles result in reduced OLs, the lamina being specially affected (Bonini et al., 1993; Cheyette et al., 1994; Serikaku and O'Tousa, 1994). However, experiments (Fischbach and Technau, 1984) using *so* chimeras have indicated that the lamina and medulla reduction seen in *so* flies is likely to be the consequence of a lack of innervation from the reduced eyes, raising the possibility that the OL expression of at least *so* has no major relevance for OL development. However, a cell-autonomous requirement for *so* or *eya* has not been tested to date. As mentioned above, the expression of *dac*, another RD gene, is detected in lamina cells, where it is required for the ensuing differentiation of the lamina (Huang and Kunes, 1996; Chotard et al., 2005). In the compound eye *dac* expression requires *eya* and *so* input (Chen et al., 1997; Pignoni et al., 1997), but it has not been established whether this is also the case during lamina development.

Here, we investigate the specification mechanisms of the lamina, as the first neuropil of the OLs, focusing on the expression and function of RD genes. We show that the expression of the RD genes *eya* and *so* is mutually dependent. These genes are required cell-autonomously for *dac* expression, which additionally requires the Hh signaling provided by incoming retinal PR axons. *dac* is instrumental for the differentiation of lamina neurons as it is required to repress *hth*, which would otherwise impair *sim* expression. In addition, we identify a role for *hth* in the neuroepithelium (NE), where it is normally co-expressed with *eya/so*. *hth* is required for normal NE growth and to control the extent and levels of expression of *eya*. Therefore, an *hth-eya-so-dac* core network is shared by the lamina and the compound eye. However, major differences exist in the roles played by these genes, including a role of *dac* in lamina differentiation as a necessary *hth* repressor.

## RESULTS

### Changes in the expression of RD genes accompany the specification of the lamina

The development of the lamina and of the compound eye show a number of important similarities. The differentiation of lamina neurons is triggered by Hh. Differentiation progresses as a fan-shaped wave marked by an indentation, the LF (Selleck and Steller, 1991), which moves from lateral to medial as incoming axons are sent in by newly formed rows of ommatidia (Umetsu et al., 2006). This is reminiscent of the Hh-driven movement of the morphogenetic furrow in the eye (Wolff and Ready, 1991). In addition, expression of the RD genes *dac*, *eya* and *so* during L3 lamina development has been reported (Cheyette et al., 1994; Serikaku and O'Tousa, 1994; Bonini et al., 1998). Therefore, and in order to analyze these similarities in more detail, we first mapped the expression domains of *eya*, *so*, *dac*, *sim* and *hth* in the developing OL.

During L3, NE progenitors, which express high levels of DE-cad (Egger et al., 2007), give rise to *dac*-expressing lamina cells laterally

and to medulla neuroblasts medially (Fig. 1A–D). The expression of *lethal of scute* [*l(1)sc*] in a narrow band, two to three cells in width, marks the transition zone after which medulla neuroblasts are generated medially (Yasugi et al., 2008) (Fig. 1E), while the LF marks the transition between the NE progenitor cells and the lamina (Hofbauer and Campos-Ortega, 1990; Huang and Kunes, 1996). Therefore, *l(1)sc* expression medially and the LF laterally define the NE progenitor domain (Fig. 1E,G). The onset of *dac* expression starts posterior to the LF, in its posterior slope, and is maintained throughout lamina development (Huang and Kunes, 1996; Chotard et al., 2005; Umetsu et al., 2006). Differentiating lamina cells expressing *sim* are located posterior to the LF (Umetsu et al., 2006). Expression of *sim* is detected weakly and uniformly in the preassembly domain, but clear nuclear staining can be seen only in the assembly domain (Umetsu et al., 2006) (Fig. 1C,D). *hth* expression is detected in medulla neuroblasts and neurons, in the NE progenitors (Reddy et al., 2010; Hasegawa et al., 2011; Morante et al., 2011; Li et al., 2013; Suzuki et al., 2013) and also within the posterior slope of the LF (Fig. 1D,E,F). However, *hth* expression is absent in more internal lamina regions (i.e. the preassembly and assembly domains). Interestingly, the expression of *hth* and *sim* abut each other within the lamina (Fig. 1D). *eya* expression does not extend into the medulla, being detected in the transition zone, overlapping *l(1)sc*, the NE progenitors and through the furrow into the lamina (Fig. 1E). *eya* levels increase just posterior to the furrow, and these levels are sustained throughout the lamina. The expression of *so* follows exactly that of *eya* (supplementary material Fig. S1).

Thus, three domains can be distinguished along the lamina differentiation path: (1) NE progenitor cells that express *hth* and low levels of *eya/so* anterior to the LF; (2) lamina precursor cells (LPCs), located in the posterior slope of the furrow, are characterized by the expression of *hth* and high levels of *eya/so* and *dac*; and (3) the preassembly and assembly domains of the lamina, where *hth* is no longer expressed and which accumulate increasing *Sim*. These patterns are summarized in Fig. 1G.

### Mutual feedback of *eya* and *so*

The similar expression of *eya* and *so* suggested that these genes might regulate the expression of each other. To test this, we induced clones expressing RNAi transgenes specific for either *eya* or *so*. In these clones, the levels of the targeted proteins, as detected by specific antibodies, were reduced to background levels, indicating severe gene expression loss (Fig. 2). When *eya* was knocked down *So* expression was lost within the clones (Fig. 2A), and when *so* was knocked down *Eya* expression was strongly reduced (Fig. 2B). Therefore, the expression of *eya* and *so* is mutually dependent, although this dependence for *eya* might be only partial. A feedback between *eya* and *so* has also been described during eye and ocelli development (Pignoni et al., 1997; Brockmann et al., 2011).

### *eya* and *so* are required for *dac* expression

*dac* expression is known to lie downstream of *eya* and *so* in the compound eye (Chen et al., 1997). We tested whether this was also the case in the lamina by inducing clones in which *eya* or *so* function had been lost (*eya*<sup>ES</sup>) or knocked down (*so* RNAi). In both experiments, *dac* expression was not activated within the clones and the effects were cell-autonomous (Fig. 3A,B). Interestingly, loss of *eya* or *so* resulted in *hth* expression beyond its normal limit, raising the possibility that *dac* loss was due to its repression by *hth*. To distinguish between a direct activating role by *Eya/So* versus a repression by *hth*, we compared the effects on *dac* of removing *so* alone or together with *hth*. *dac* expression was cell-autonomously



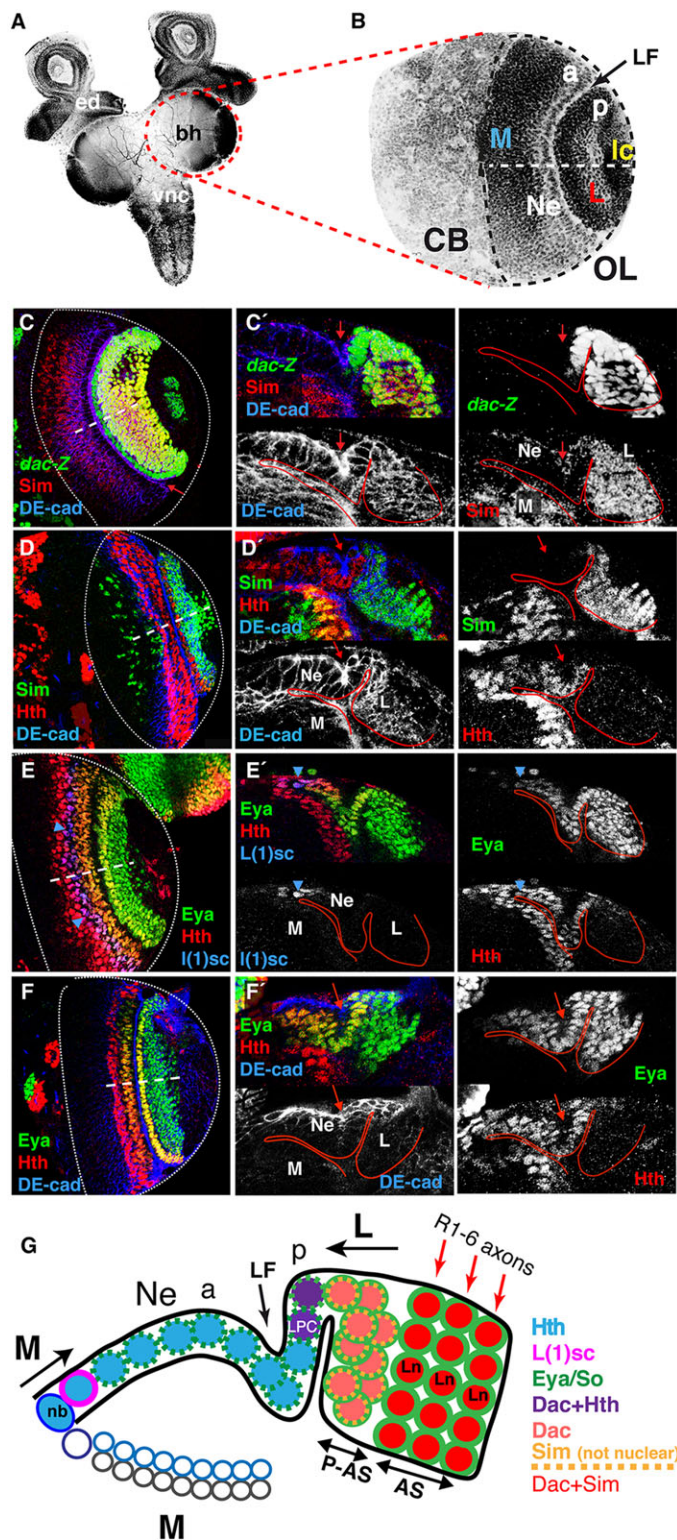

**Fig. 1. Expression of *hth*, *eya*, *dac* and *sim* in the OL during the progression from NE progenitors to lamina neurons.** Except in A, OLs are oriented medial (proximal) to the left, lateral (distal) to the right in this and all other figures. In B (black dashed line) and in C–E (white dotted line) the OL is outlined. (A) CNS of a late L3 larva counterstained with the DNA marker DAPI. The CNS comprises the ventral nerve cord (vnc) and the brain hemispheres (bh). The eye discs (ed) lie directly on top of the brain hemispheres. (B) Magnified surface view of the right brain hemisphere. CB, central brain; M, medulla; Ne, neuroepithelium; L, lamina; Lc, lobula complex; a, anterior to the lamina furrow (LF, arrowed); p, posterior to the LF. The white dashed lines in C–F indicate the approximate positions of the transverse sections shown in C'–F'. Surface views (C–F) and confocal z-sections (C'–F') of late L3 OLs, stained as indicated (single channels and merges are shown). In C, the OL is from a *dac-Z* larva. Anti- $\beta$ -galactosidase is used to follow *dac* transcription. The blue arrowheads (E, E') point to *l(1)sc*-expressing cells. Red arrows indicate the LF. (G) Summary of expression patterns on a schematic section through the medulla and lamina. The arrows marked by M and L indicate the movement of the medulla and lamina differentiation waves, respectively. The green dotted outline indicates low expression levels of *Eya* and *So*. nb, medulla neuroblasts; Ln, lamina neurons; LPC, lamina precursor cell; P-AS, preassembly domain; AS, assembly domain. Red arrows indicate R1–6 incoming axons.

as a *dac* repressor behind the LF. In addition, the fact that *dac* expression did not extend medially into the *eya/so*-expressing domain in *hth*<sup>−</sup> clones indicated that these RD genes are not sufficient to induce *dac* expression. This is consistent with the *hh* pathway being additionally required for *dac* expression (Huang and Kunes, 1996).

Previous work by Pappu and co-workers identified two enhancers in the *dac* gene (Pappu et al., 2005), one of which, *dac3EE*, was noted to drive strong reporter gene expression in the lamina. We confirmed very strong expression of this enhancer in the lamina, plus weaker expression in the lobula (Fig. 3E; data not shown). *eya* knockdown clones, in which *dac* expression was lost, also lost *dac3EE-Z* activity (Fig. 3E). This suggests that *eya* acts via *dac3EE* to regulate *dac* lamina expression.

#### ***dac* is required in the lamina to repress *hth* downstream of the *hh* pathway**

The expression of *dac* builds up in the posterior slope of the LF, preceding the shutting off of *hth* in the lamina preassembly domain. This observation raised the possibility of *dac* being involved in *hth* repression. In fact, blocking the Hh signaling pathway by removing the Hh signal transducer *smoothedown* (in *smo*<sup>−</sup> clones) results not only in a loss of *dac* (Fig. 4A) (Huang and Kunes, 1996) but also in an expansion of *hth* expression into the lamina (Fig. 4B). Interestingly, the expression of *eya* does not depend on *hh*, as its expression remains unaltered in *smo*<sup>−</sup> clones spanning the lamina (Fig. 4B) in spite of *hth* expression. In test if *hth* repression is mediated by *dac*, we examined the effect of removing *dac* on *hth* expression. In *dac*<sup>−</sup> clones, *hth* is upregulated in internal regions of the lamina whereas *eya* expression is unaffected (Fig. 4E), suggesting that *Eya/So* cannot repress *hth* in the absence of *Dac*. To prove that this effect was not due to a regulatory feedback of *dac* on the Hh signaling pathway, we checked *dac* requirement for Hh signaling activity. Whereas in *smo*<sup>−</sup> clones the expression of the downstream signaling component *cubitus interruptus* (*ci*) (Motzny and Holmgren, 1995; Alexandre et al., 1996) is reduced (Fig. 4C), in *dac*<sup>−</sup> clones *ci* expression was unaltered (Fig. 4D), indicating that *dac* is not generally required for Hh signal transduction. Altogether, these results indicate that *dac* is required downstream of *eya/so* and the *hh* pathway to repress *hth*. As *smo*<sup>−</sup> cells cannot differentiate as lamina neurons, these *smo*<sup>−</sup>, *eya*-expressing, *dac*-nonexpressing cells are likely to remain in a lamina precursor state. When we performed the converse experiment and expressed *dac*

lost in both *so-RNAi* clones (in which *hth* is maintained) as in *so-RNAi+hth-RNAi* clones (Fig. 3B,C). Therefore, *dac* regulation requires the positive input of the RD genes and does not seem to be negatively regulated by *hth* (see below). To test this specifically, we induced *hth-RNAi* clones and checked for changes in *Dac* levels. We compared the *Dac* immunofluorescence signal within and outside *hth-RNAi* clones (Fig. 3D) and found no difference (ten clones from seven OLs were analyzed). Therefore, *hth* is not acting



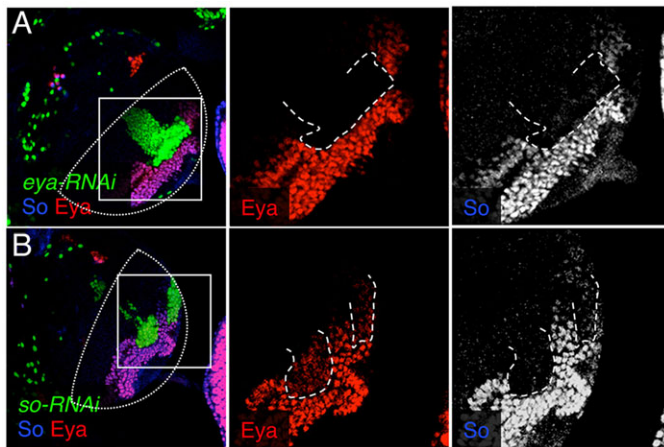

**Fig. 2. Mutual dependence of *eya* and *so* expression.** GFP-marked clones expressing *eya-RNAi* (A) or *so-RNAi* (B). OLs are outlined (white dotted line). Single channels are shown at higher magnification for the boxed regions, where clones are outlined (white dashed line). (A) RNAi-mediated *eya* knockdown efficiently reduces Eya signal to background levels. In these clones *So* signal is absent. *eya-RNAi* clones extend to, but do not enter, the lamina.  $N=10$ . (B) RNAi-mediated *so* knockdown also reduces *So* signal to background levels. In these clones Eya is still expressed, although at reduced levels.

ectopically in the NE, *hth* expression was downregulated cell-autonomously (Fig. 4F), indicating that *dac* is not only required but also sufficient to repress *hth*.

Molecularly, *Dac* proteins have been shown to work, at least in some developmental contexts, in a complex with *So*/*Six* and *Eya* proteins (Chen et al., 1997; Pignoni et al., 1997; Ikeda et al., 2002). In order to gain insight into whether such a complex might be involved in *sim* activation and *hth* repression in the developing lamina, we examined the expression of both genes in clones expressing *dac* but lacking *eya* (and, therefore, also *so*) using the MARCM technique. *eya<sup>-</sup> dac<sup>+</sup>* clones, as is also the case for clones mutant for *eya* only, abutted the lamina. In these clones ( $N=5$ ), *Hth* expression was maintained at levels similar to those in adjacent, non-mutant cells (supplementary material Fig. S2A). Only in two cases (out of more than 40 clones examined) the *eya<sup>-</sup> dac<sup>+</sup>* clone clearly spanned the preassembly domain, allowing the analysis of clones in the *Sim*-expressing region. In one case, *Sim* expression was reduced within the clone (supplementary material Fig. S2B,C), whereas no noticeable alteration in *Sim* levels was observed in the second clone (supplementary material Fig. S2D,E). *eya<sup>-</sup> dac<sup>+</sup>* clones falling entirely within the lamina were extremely rare and small (1–3 cells). In one such example, *Sim* expression was absent from the *eya<sup>-</sup> dac<sup>+</sup>* cells (supplementary material Fig. S2D,E, inset). These results suggest that *Dac* is unable to regulate *hth* in the absence of its partner *Eya*; with the limited evidence at hand, this might also be the case for *sim*. The low recovery of *eya<sup>-</sup> dac<sup>+</sup>* cells in the OLs might be due to high apoptosis rates induced by *dac*, as we detect increased levels of the apoptosis marker activated Caspase 3 in OLs from brains containing *dac<sup>+</sup>* clones (data not shown).

#### ***hth* maintenance in lamina cells prevents *sim* upregulation**

Finally, we examined the impact of misregulation of *hth*, *eya/so* and *dac* on *sim* expression, as this gene marks further differentiation steps in the lamina (Umetsu et al., 2006). In *so<sup>-</sup>* clones, *sim* expression is reduced (Fig. 5A). However, in these clones *hth* is derepressed (Fig. 5A and see Fig. 3B). Therefore, the loss of *sim* could be due to either the loss of a positive input (RD) or the

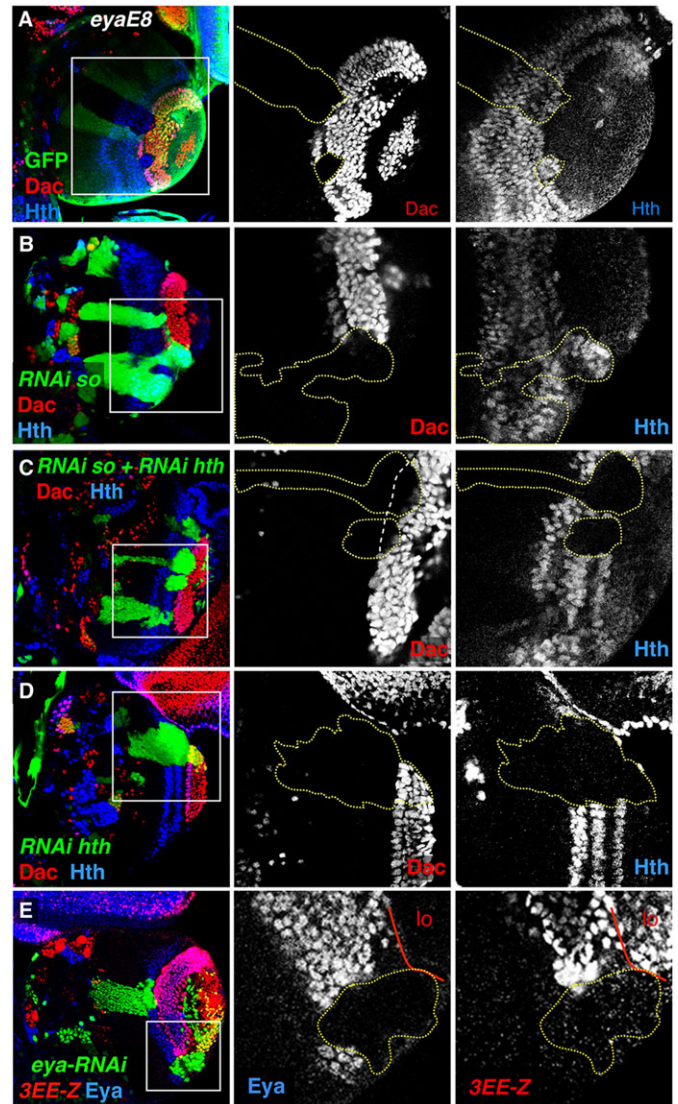

**Fig. 3. *eya* and *so* regulate *dac* expression in the lamina, probably through the *dac3EE* enhancer.** (A–E) (Left) Surface view of late L3 OLs containing clones. (Middle and right) Higher magnifications of the boxed regions as individual channels. Clones are outlined (dotted yellow line). (A) *eya* mutant cells fail to upregulate *Dac* and maintain *Hth* expression. *eya<sup>E8</sup>* mutant cells, marked by the absence of GFP, are stained for Eya and Hth.  $N=5$ . (B,C) *So* is required for *Dac* expression. (B) *so-RNAi* cells and (C) *so-RNAi+hth-RNAi* clones stained for Hth and *Dac*. Clones are positively labeled with GFP. (B) In *so* mutant cells expression of *Hth* is maintained.  $N=3$ . (C) Failure to upregulate *Dac* expression in *so* mutant cells is not due to the maintenance of *Hth*. (D) *Dac* expression is not affected in *hth-RNAi* clones.  $N=6$ . (E) GFP-marked *eya-RNAi* clone in a *dac3EE* background, stained with anti- $\beta$ -galactosidase (3EE-Z) and for Eya. Within the clone, enhancer expression is lost.  $N=3$ . The solid red line (E) separates the lamina from the prospective lobula (lo), where *dac3EE-Z* is also expressed.

presence of a repressor (*Hth*). To distinguish between these two possibilities, we simultaneously knocked down *so* and *hth*. In *so<sup>-</sup> hth<sup>-</sup>* clones, *sim* expression is still reduced or absent (Fig. 5B), pointing to the need for a positive *sim* regulator. Since *eya* and *so* are required for *dac* expression, we next checked the effect of only removing *dac* (which does not affect the expression of its upstream regulators *eya/so*; Fig. 4E). Again, *sim* expression was reduced cell-autonomously in *dac<sup>-</sup>* clones (Fig. 5C). However, and as we showed previously, loss of *dac* is accompanied by *hth* upregulation (Fig. 5B,



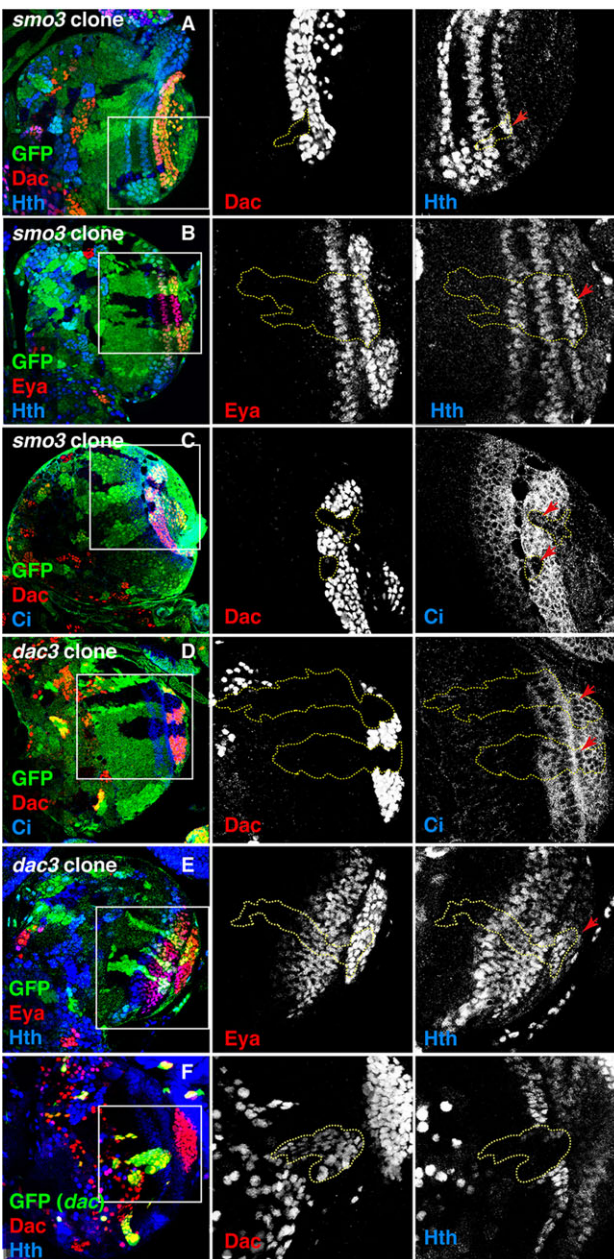

**Fig. 4. *dac* represses *hth* downstream of the *hh* pathway.** (Left) Surface view of late L3 OLs containing clones. (Middle and right) Higher magnifications of the boxed regions as individual channels. Clonal tissue is outlined (dotted yellow line) and indicated by red arrows. (A–E) *smo*<sup>3</sup> (A–C) and *dac*<sup>3</sup> (D,E) mutant clones (marked by the absence of GFP) were stained for Dac and Hth (A), Eya and Hth (B,E) and Dac and Ci (C,D). (A,B) In *smo*<sup>3</sup> clones, Dac is not expressed (A, *N*=4) and Hth is upregulated and at times extended (B). (B,E) Levels of Eya remain unaltered in both *smo*<sup>3</sup> (B, *N*=7) and *dac*<sup>3</sup> (E, *N*=3) mutant clones. (C) In the OL, the expression of *ci* depends on Hh signaling, as *ci* signal is reduced in *smo*<sup>3</sup> clones. *N*=2. (D) This is not the case in *dac* clones, suggesting that in the absence of *dac*, Hh signaling is still active. *N*=2. (E) Loss of *dac* results in Hth extension into the lamina. *N*=2. (F) GFP-marked *dac*-expressing clone stained for Dac and Hth. In gain-of-function *dac* clones *hth* is repressed. *N*=2.

see also Fig. 4E). In order to determine if *hth* was directly responsible for *sim* repression in *dac*<sup>−</sup> cells, we induced *hth*-expressing clones in the lamina (Fig. 5D,E). In these clones *sim* is repressed (Fig. 5D) without detectable changes in *dac* expression (Fig. 5E).

We conclude that the RD genes are required for full *sim* expression, acting both as *sim* activators and *hth* repressors. A crucial role in this regulation is played by *dac*, which is necessary to repress *hth*.

#### ***hth* is required in the NE to promote growth and to modulate the extent and levels of *eya* expression**

Our results so far indicate that the repression of the transcription factor *hth* within the lamina is necessary to allow its proper differentiation. However, *hth* is expressed at earlier stages in the NE progenitors, where it overlaps with *eya* and *so* (Fig. 1E,F; supplementary material Fig. S1). To establish whether *hth* plays any positive role in the NE, we first analyzed the impact of loss of *hth* on tissue growth. *hth*<sup>−</sup> clones were recovered throughout the OL, although they were 30–40% smaller than their wild-type twin clones (Fig. 6A,B), suggesting a role of *hth* in proliferation. Next, we investigated whether *eya* expression would be affected by removing *hth*. Owing to the smaller size of *hth*<sup>−</sup> clones, we induced *hth* loss-of-function mosaics using the Minute technique in order to recover larger clones and make the analysis of the effects of *hth* removal on *eya* expression easier. *hth*<sup>+</sup> *M*<sup>+</sup> clones showed a slight expansion of *eya* expression (Fig. 6C). In addition, when the intensity of the *eya* signal was compared between *hth* mutant and adjacent control tissue, we observed an increase of ~20% in *eya* levels in the *hth*<sup>−</sup> cells (12 *hth*-RNAi clones from seven OLs analyzed).

These results indicate that *hth* modulates the extent and levels of *eya* expression, suggesting that the levels of *hth* might be subject to tight regulation. Indeed, this does seem to be the case, as clones overexpressing *hth* block *eya* expression in the NE (Fig. 6D). We noted, however, that this repression was only detectable in the NE. Neither in *smo*<sup>−</sup> nor in *dac*-mutant clones, where *hth* expands a few rows into the lamina, did we observe any significant change in *eya* expression posterior to the LF. This might indicate that another, as yet unidentified, factor aids *hth* in modulating *eya* expression in the NE. Alternatively, *dac*, the expression of which is turned on just after the LF, could enhance *eya* expression, making it insensitive to *hth*. Loss of *hth*, in *hth*-RNAi clones, does not result in premature *Sim* expression (Fig. 5F), consistent with the requirement of multiple inputs for *sim* activation.

#### **DISCUSSION**

In this study we have uncovered a gene regulatory network that operates cell-autonomously during the specification of lamina neurons in the OLs. The regulatory model that emerges from our work is summarized in Fig. 7.

We have shown that the expression of the RD genes *eya* and *so* is required cell-autonomously for the specification of lamina neurons through the activation of at least *dac* and *sim*. Their expression is initiated in the NE cells at low levels, but this expression increases after the LF. The fact that *eya* and *so* positively regulate each other would, above a certain expression threshold, cause *eya* and *so* to lock in their transcription to maximal levels. *hth* might regulate that threshold, since *hth* acts *in vivo* as a repressor of *eya* in NE progenitors. Regulation of *eya* expression might be further required for the spatial segregation of cells in different states along the lamina differentiation pathway. Thus, *eya*<sup>−</sup> clones are seldom recovered in internal regions of the lamina (Fig. 3A), which might be indicative of a segregation of the *eya*-mutant tissue or the elimination of these cells from within the lamina. Something similar happens with *smo* and *sim* mutant clones, which do not appear in internal regions of the lamina either (Umetsu et al., 2006). In addition, *hth* is required to



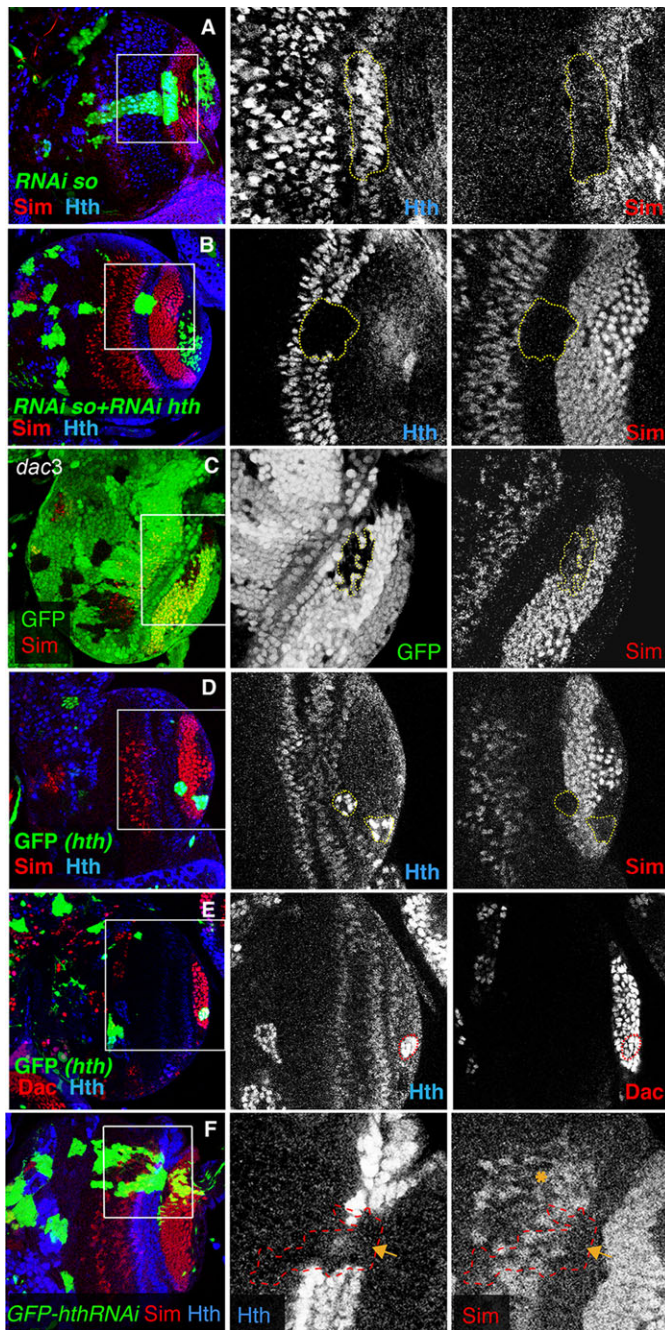

**Fig. 5. *sim* expression depends on a direct regulatory input from RD genes and on the repression of *Hth*.** (A–E) (Left) Lateral views of late L3 OLS. (Middle and right) Higher magnifications of the boxed regions as individual channels. (A,B) *Sim* expression depends on a positive input from the RD. *so*-RNAi (A,  $N=5$ ) and *so*-RNAi+*hth*-RNAi (B,  $N=4$ ) clones positively marked by GFP expression were stained for *Hth* and *Sim*. In both situations, the expression of *Sim* is lost cell-autonomously. (C) In *dac*<sup>3</sup> clones (marked by the absence of GFP) *Sim* expression is reduced, but not totally lost.  $N>10$ . (D,E) Ectopic expression of *hth* in clones within the lamina. Clones are positively marked by GFP and were stained for *Hth* and *Sim* (D,  $N=11$ ) and *Hth* and *Dac* (E,  $N=5$ ). The expression of *Sim* is lost cell-autonomously, whereas *Dac* expression remains unaltered. (F) Flip-out *hth*-RNAi clones, marked positively by GFP, and stained for *Hth* and *Sim*. Loss of *Hth* does not cause *Sim* expression changes.  $N=6$ . The clone is outlined (red dashed line). The orange arrow points to the LPC domain. The asterisk marks some scattered *Sim*-positive cells that lie beneath the NE in the developing medulla (see also Fig. 1C,D for *Sim* expression in transverse sections of the OLS).

sustain normal NE cell proliferation, as *hth*-mutant clones grow, on average, 30% less than wild-type clones.

The recruitment of lamina precursors from NE progenitors is driven by incoming waves of R1–6 axons, thereby coupling it to retinal differentiation (Selleck and Steller, 1991; Huang and Kunes, 1996). Axon-delivered *Hh* activates its downstream pathway and, as a consequence, *dac* expression is upregulated in *eya/so*-expressing cells (Huang and Kunes, 1996; Chotard et al., 2005). We show that the net result of this activation is an efficient repression of *hth* to allow the full expression of *sim* and, thereby, normal lamina differentiation. *Dac*, and its vertebrate Dach homologs, have been shown to form a protein complex with *So*/*Six* and *Eya* family proteins (Chen et al., 1997; Pignoni et al., 1997; Ikeda et al., 2002) and to synergize with them in ectopic eye induction assays (Chen et al., 1997; Pignoni et al., 1997). In addition, *Dac* possesses a DNA-binding domain (Kim et al., 2002). The fact that ectopic *dac* expression does not seem capable of repressing *hth* without *eya* suggests that this function would require the formation of a trimeric complex with *So* and *Eya*. *hth*, *eya*, *so* and *dac* are transiently co-expressed in some cells of the posterior slope of the LF, before *hth* is shut off. This posterior slope might represent a transition zone in which these regulatory processes are taking place (Fig. 1G). Regarding the activation of *sim* expression, we have not been able to clearly determine whether it can be carried out by *Dac* alone or by a *So*-*Eya*-*Dac* complex, although the limited evidence that we have gathered is compatible with *Dac* requiring *Eya*/*So* cooperation.

In the compound eye, progenitors are characterized by *hth* expression, whereas the precursor population (contained in the so-called pre-proneural domain) expresses high levels of *eya*, *so* and *dac*, and no *hth* (Bessa et al., 2002). However, detailed inspection of the eye progenitor domain shows that the *hth*-expressing cells also co-express RD genes such as *eya*, although at low levels (supplementary material Fig. S3), as we have shown to be the case in NE progenitors in the OL. Therefore, eye and lamina derive from progenitors that show many similarities. However, there are several profound differences. Neither *ey* nor *toy*, the two Pax6 genes positioned at the top of the genetic hierarchy of eye development, is expressed during lamina development (Callaerts et al., 2001; Morante et al., 2011; Southall et al., 2013) (supplementary material Fig. S4), and all available information on *ey* function, including that from *ey* mutants (Callaerts et al., 2001), expression of dominant-negative *ey* forms (Morante et al., 2011) or RNAi-mediated *ey* and *toy* knockdowns (our unpublished data), is compatible with these genes not playing a direct role in lamina development, at least during larval stages. Also, neither *tsh* nor its paralog *tio* is expressed in the OPC NE (Southall et al., 2013; data not shown), although cells of the OPC NE are ready to respond to *tsh* expression by proliferating and blocking lamina differentiation (supplementary material Fig. S5). Since, in the eye, *tsh* and *hth* have been shown to directly interact with Yki to activate Hippo-regulated target genes (Peng et al., 2009), and since the proliferation in the OPC is controlled by the Hippo pathway (Reddy et al., 2010), providing *tsh* is likely to engage *hth* and *yki* in maintaining the progenitor state of neuroepithelial cells as well. Another significant difference between lamina and eye development is that, during eye development, *hh* does not regulate *hth* expression, at least not directly, because blocking the *hh* pathway in *smo*<sup>−</sup> clones does not affect the *hth* expression pattern (Firth and Baker, 2009; Lopes and Casares, 2010). In the eye, *hth* repression is carried out mostly by the BMP2 homolog *Dpp* (Lopes and Casares, 2010), which is itself an *Hh* target (Heberlein et al., 1993; Greenwood and Struhl, 1999; Fu and Baker, 2003). In the OLs, *Dpp* has been shown to play a different role: the specification of lamina glia (Yoshida et al., 2005).



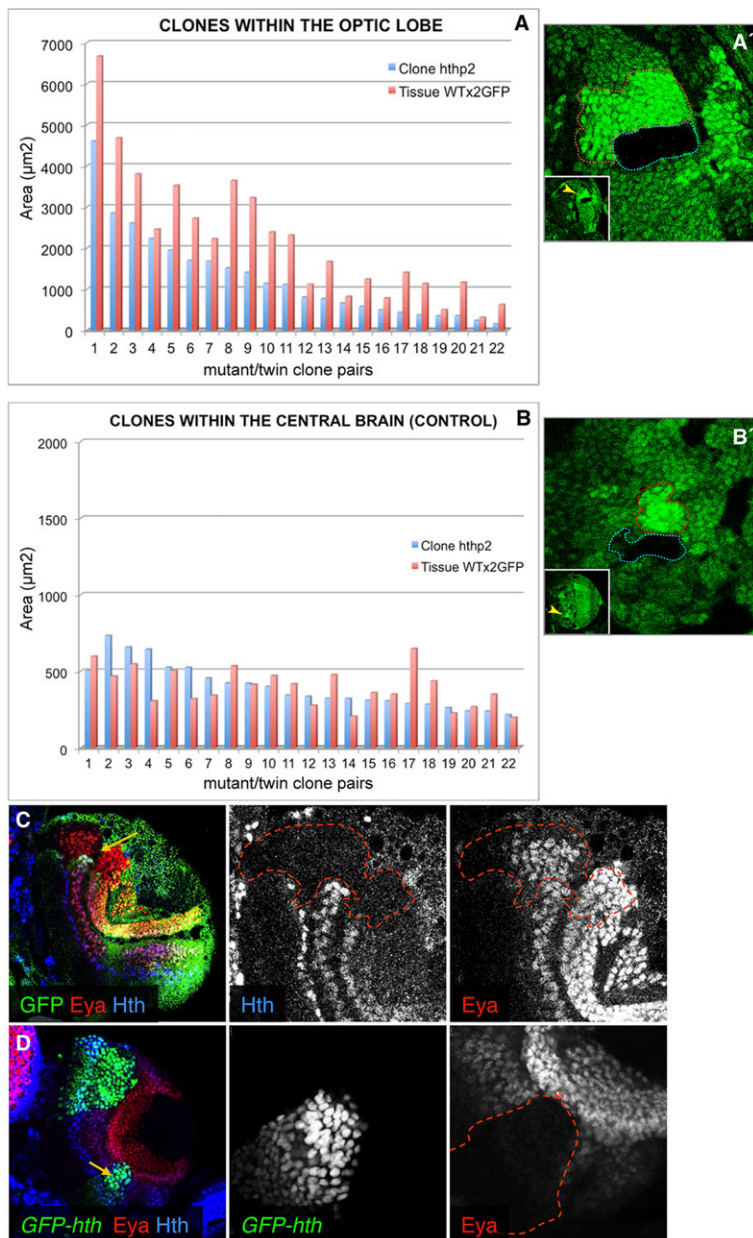

**Fig. 6. Loss of *hth* reduces tissue growth in the OL NE and modulates the extent and levels of *eya* expression.** (A,B) The clonal area of each pair of *hth*<sup>P2</sup> and wild-type twin clones in the OPC of the OL (A) and in the adjacent central brain (CB) (B). On the x-axis, all pairs of mutant/twin clones are represented (*N*=22 pairs of mutant/twin clones in both the OPC and CB). The CB is used as an internal control because *hth* expression is not generalized here. In the OPC, the mutant clone area is always smaller than the adjacent twin area by ~30–40% ( $P<5\times 10^{-7}$ ), whereas there is no difference in the CB ( $P>0.9$ ). For statistical analysis a non-parametric paired Mann–Whitney–Wilcoxon's test was applied. (A',B') Two representative mutant/twin clone pairs in each region are shown. Late L3 OLs were stained for GFP; the blue dotted line delimits the mutant clone and the red dotted line delimits the 2×GFP twin clone. For orientation, in the insets the arrowhead marks the position of the clone pair. Whereas in the CB the area of the *hth*<sup>P2</sup> clone (marked by the absence of GFP) is similar to that of its twin clone (2×GFP: brightest GFP area), in the OPC the *hth*<sup>P2</sup> clone is smaller. (C,D) Surface views of late L3 OLs. Arrows point to clones shown at higher magnification in the central and right panels as individual channels. Clones are outlined (dashed red line). (C) *hth*<sup>P2</sup>, *M*<sup>+</sup> clone (marked by the absence of GFP in green) stained for Hth and Eya. Within the clone, Hth immunoreactivity is lost and Eya expression extends medially. (D) Flip-out *GFP-hth* clones stained for Hth and Eya. Forced expression of *hth* results in Eya repression. *N*=5.

Perhaps the most striking difference, though, lies in the role played by *dac*. In the eye, *dac* is required for the initiation of retinal differentiation; however, once the differentiation wave is progressing, removal of *dac* has little effect on the process (Mardon et al., 1994). Accordingly, *dac*<sup>−</sup> clones do not derepress *hth* (C. Bras-Pereira and F.C., unpublished). By contrast, *dac* is necessary for the correct differentiation of the lamina, where it is required for *hth* repression. Our study shows that *sim* expression is reduced in *dac*-mutant cells. In a previous study, Umetsu et al. (2006) found no effect on *sim* upon *dac* removal. We note that our clones were induced using a heat shock-inducible flipase (*hsFLP*), whereas the clones used by Umetsu and co-workers were induced with the *NP6099-GAL4* line (Yoshida et al., 2005) driving *UAS-FLP*, which may cause a milder phenotype due to delayed timing of clone induction. This could have resulted in only a subtle reduction in *Sim* expression. The fact that in the absence of *dac* the expression of *sim* is reduced but not absent argues for the existence of a *dac*-independent *sim* activator, probably Hh (Fig. 7).

The use of the *hth-eya-so-dac* cassette seems to be evolutionarily conserved, as genes of the Pax, Six, Eya, Dach and, in some instances, Meis gene families have been shown to be co-expressed and functional during the development of many different organ types in vertebrates: from eyes, sensory placodes or brain regions to muscle, kidney or pancreas (Ikeda et al., 2002; Zhang et al., 2002, 2006; Li et al., 2003; Bessarab et al., 2004; Purcell et al., 2005; Bumsted-O'Brien et al., 2007; Kaiser et al., 2007; Erickson et al., 2010; Santos et al., 2011). Therefore, further study of the early development of the *Drosophila* lamina might shed light on the general mechanisms governed by this multipurpose genetic cassette in vertebrates.

## MATERIALS AND METHODS

### Genotypes and genetic manipulations

Larvae were raised at 25°C, unless otherwise indicated. *w*<sup>1118</sup> was used as control strain. *P{PZ}dac P(ry<sup>+</sup>)/Cyo; ry<sup>506</sup>* was used as a reporter for *dac* expression. For targeted misexpression we used the *UAS/GAL4* system

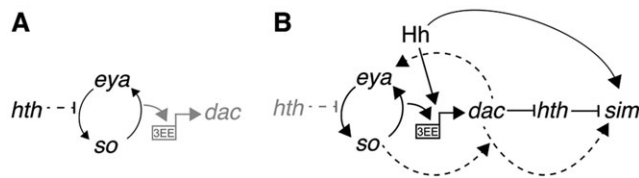

**Fig. 7. Regulatory network of lamina specification.** Regulatory relationships before (A) and after (B) the LF. Before the LF, NE cells co-express *hth* plus *eya* and *so*. The dashed repressive line (with T-bar) indicates a minor role for *hth* in regulating the extent and levels of *eya* (A). Behind the furrow, *dac* expression requires Eya and So cell-autonomously, as well as Hh delivered by retinal axons. This activation might be through the *dac3EE* enhancer (3EE). In addition, *dac* expression is required for tilting the equilibrium between *hth* and *eya/so* autoregulatory loop towards full *eya/so* activation and full *hth* repression (dashed connection from *dac* to *eya*) (B). Expression of Sim within the lamina requires Hh signaling (Umetsu et al., 2006), repression of Hth mediated by *dac* and, at the same time, the positive input of the RD genes (dashed arrow from the Eya/So autoregulatory loop into the *dac* to *sim* link). Whether this input is exerted by *Dac* is not known (dashed arrow from *dac* to *sim*; B).

(Brand and Perrimon, 1993). UAS strains used were: *UAS-eya-RNAi* (VDR, 43911), *UAS-so-RNAi* (VDR, 104386), *UAS-hth-RNAi* (VDR, 12764), *UAS-GFP-hth* (Casares and Mann, 2000), *UAS-Flag-HA-eyaB2* and *UAS-Flag-HA-tsh* (both kindly provided by C. M. Luque, Universidad Autónoma, Madrid, Spain), *UAS-dac* and *UAS-GFP* (Bessa and Casares, 2005).

Clones of cells mutant for *hth* (*hth<sup>P2</sup>*), *smo* (*smo<sup>3</sup>*), *eya* (*eya<sup>E8</sup>*) and *dac* (*dac<sup>3</sup>*) were generated through mitotic recombination (Xu and Rubin, 1993). These alleles are described in FlyBase. Clones were induced by a 30 min heat shock at 37°C between 48 h and 72 h after egg-laying (AEL) in larvae of the following genotypes: *yw, hsFLP;; FRT82B hth<sup>P2</sup>/FRT82B Ubi-GFP, yw, hsFLP; eya<sup>E8</sup> FRT40A/Ubi-GFP FRT40A, yw, hsFLP, smo<sup>3</sup> FRT40/Ubi-GFP FRT40A* and *yw, hsFLP; dac<sup>3</sup> FRT40/Ubi-GFP FRT40A*. In all these cases, mutant cells were marked by the absence of GFP. In order to give *hth<sup>P2</sup>* mutant cells a growth advantage, *hth<sup>P2</sup>* clones were induced using the Minute technique (Morata and Ripoll, 1975). Clones were induced in *yw, hsFLP; FRT82B hth<sup>P2</sup>/FRT82B arm-lacZ, M (3)<sup>w<sup>124</sup></sup>* larvae by a 30 min heat shock at 37°C between 48 h and 72 h AEL. Clones were detected by the absence of β-galactosidase. The MARCM technique (Lee and Luo, 2001) was used to ectopically express *Dac* in the absence of *eya*. *yw, hsFLP, tub-Gal4, UAS-GFP; FRT40A, tub-Gal80/CyO* females were crossed to *eya<sup>E8</sup> FRT40A/CyO; UAS-Dac/TM6B* males. Larvae were heat shocked between 48 h and 72 h AEL for 45 min at 37°C. Non-*Tb*, GFP-positive larvae were selected for analysis. Mutant tissue was positively marked with GFP.

Ectopic expression clones were generated randomly using the flip-out method (Struhl and Basler, 1993). *yw, hsFLP, act>y+>Gal4;; UAS-GFP/TM6B, Tb* females were crossed to males carrying the *UAS* transgenes (either homozygous or balanced over *TM6B, Tb*). Clones were induced between 48 h and 72 h AEL by a 10 min heat shock at 35.5°C. For *UAS-RNAi* lines only, after heat shock larvae were grown at 29°C to maximize transgene expression; otherwise, cultures were maintained at 25°C. To induce clones within the lamina region, heat shock was performed between 72 h and 96 h AEL. Non-*Tb* larvae were selected for dissection and analysis. Clones were positively marked with GFP.

### Construction of the *dac3EE-Z* transgenic strain

The genomic region containing the *dac3EE* enhancer (Pappu et al., 2005) was PCR amplified, cloned into PCR8/GW/TOPO (Invitrogen) and transferred into *attB*-prV-V-lacZ vector (kindly provided by R. S. Mann, Columbia University, New York). The *attB* construct was inserted in the second chromosome at the 22A *attP* site via phi-C31-mediated transgenesis (Bischof et al., 2007). The primers used were: 5'-GATCCCAAAAG-GACATCTCAA-3' and 5'-TCGAATGCAATTTAAACAGAAAAA-3'. Standard genetic techniques were used to introduce the *dac3EE-Z* line into appropriate genetic backgrounds.

### Immunohistochemistry

Eye imaginal discs and brains were dissected and fixed according to standard protocols. Primary antibodies used were: guinea-pig anti-Hth, 1/2000 (Casares and Mann, 1998); rabbit anti-β-galactosidase, 1/1000 (Cappel, 55976); rabbit anti-GFP, 1/1000 (Molecular Probes, A11122); guinea-pig anti-So, 1/1000 (Jenc and Rebay, 2007); rabbit anti-Toy, 1/50 (Jacobsson et al., 2009); rat anti-Ey, 1/100 (Halder et al., 1995); rat anti-L(1)sc, 1/100 (gift from M. D. Martín-Bermudo, CABD, Seville); and mouse anti-Sim, 1/50 (gift from A. Baonza, CBMSO, Madrid). Mouse anti-Eya (*eya10H6*; 1/100), rat anti-DE-cad (*DCAD2*; 1/100), rat anti-Elav (*7EBA10*; 1:1000), mouse anti-Dac (*mAbdac 1-1*; 1/100) and mouse anti-Ci (*mAb2A1*; 1/5) were from Developmental Studies Hybridoma Bank. Primary antibodies were incubated in PBS with 0.2% Triton X-100. Fluorescently labeled secondary antibodies (anti-mouse-488 and -568; anti-rabbit-488 and -568; anti-rat-488 and -647 and anti-guinea pig-567 and -647) were from Molecular Probes. Images were obtained on SPE or SP2 Leica confocal systems and processed with Adobe Photoshop.

### Immunofluorescence signal measurements

In order to detect quantitative changes in gene expression in gain- or loss-of-function cell clones, we measured the immunofluorescence signal within the clones and in neighboring (control) areas as an expression level correlate. Analysis was performed with ImageJ (NIH). Each clone was compared with a neighboring patch of tissue of similar area.

### Acknowledgements

We thank Carlos M. Luque for the generation of the *UAS-Flag-HA-eyaB2* and *UAS-Flag-HA-tsh* transgenes; Max Sánchez for help with statistical analysis; R. S. Mann, I. Rebay, A. Rasmuson-Lestander, A. Baonza, M. D. Martín-Bermudo and P. Callaerts for antibodies and DNAs; G. Mardon, the Vienna Drosophila Resource Center (VDR) and Bloomington Stock Center for fly strains; the Developmental Studies Hybridoma Bank (Iowa University) for antibodies; and the CABD Advanced Microscopy facility.

### Competing interests

The authors declare no competing financial interests.

### Author contributions

F.C. developed the concept of the study; C.P., C.S.L. and F.C. designed the experiments, which were carried out mostly by C.P.; F.C. prepared the manuscript with equal contributions from C.P. and C.S.L.

### Funding

This work was funded by the Spanish Ministry for Science and Innovation (MICINN/MINECO) and Feder Funds through grants [BFU2012-34324] to F.C. C.P. was funded by a fellowship [FPI BES-2007-16473] from MICINN, and C.S.L. by the Juan de la Cierva Program (MICINN/MINECO).

### Supplementary material

Supplementary material available online at <http://dev.biologists.org/lookup/suppl/doi:10.1242/dev.108670/-DC1>

### References

- Alexandre, C., Jacinto, A. and Ingham, P. W. (1996). Transcriptional activation of hedgehog target genes in *Drosophila* is mediated directly by the cubitus interruptus protein, a member of the GLI family of zinc finger DNA-binding proteins. *Genes Dev.* **10**, 2003–2013.
- Amore, G. and Casares, F. (2010). Size matters: the contribution of cell proliferation to the progression of the specification *Drosophila* eye gene regulatory network. *Dev. Biol.* **344**, 569–577.
- Bessa, J. and Casares, F. (2005). Restricted teashirt expression confers eye-specific responsiveness to Dpp and Wg signals during eye specification in *Drosophila*. *Development* **132**, 5011–5020.
- Bessa, J., Gebelein, B., Pichaud, F., Casares, F. and Mann, R. S. (2002). Combinatorial control of *Drosophila* eye development by eyeless, homothorax, and teashirt. *Genes Dev.* **16**, 2415–2427.
- Bessarab, D. A., Chong, S.-W. and Korzh, V. (2004). Expression of zebrafish six1 during sensory organ development and myogenesis. *Dev. Dyn.* **230**, 781–786.
- Bischof, J., Maeda, R. K., Hediger, M., Karch, F. and Basler, K. (2007). An optimized transgenesis system for *Drosophila* using germ-line-specific phiC31 integrases. *Proc. Natl. Acad. Sci. U.S.A.* **104**, 3312–3317.



- Bonini, N. M., Leiserson, W. M. and Benzer, S. (1993). The eyes absent gene: genetic control of cell survival and differentiation in the developing *Drosophila* eye. *Cell* **72**, 379-395.
- Bonini, N. M., Leiserson, W. M. and Benzer, S. (1998). Multiple roles of the eyes absent gene in *Drosophila*. *Dev. Biol.* **196**, 42-57.
- Brand, A. H. and Perrimon, N. (1993). Targeted gene expression as a means of altering cell fates and generating dominant phenotypes. *Development* **118**, 401-415.
- Brockmann, A., Dominguez-Cejudo, M. A., Amore, G. and Casares, F. (2011). Regulation of ocellar specification and size by twin of eyeless and homothorax. *Dev. Dyn.* **240**, 75-85.
- Bumsted-O'Brien, K. M., Hendrickson, A., Haverkamp, S., Ashery-Padan, R. and Schulte, D. (2007). Expression of the homeodomain transcription factor Meis2 in the embryonic and postnatal retina. *J. Comp. Neurol.* **505**, 58-72.
- Callaerts, P., Leng, S., Clements, J., Benassayag, C., Cribbs, D., Kang, Y. Y., Walldorf, U., Fischbach, K.-F. and Strauss, R. (2001). *Drosophila* Pax-6/eyeless is essential for normal adult brain structure and function. *J. Neurobiol.* **46**, 73-88.
- Casares, F. and Mann, R. S. (1998). Control of antennal versus leg development in *Drosophila*. *Nature* **392**, 723-726.
- Casares, F. and Mann, R. S. (2000). A dual role for homothorax in inhibiting wing blade development and specifying proximal wing identities in *Drosophila*. *Development* **127**, 1499-1508.
- Chen, R., Amoui, M., Zhang, Z. and Mardon, G. (1997). Dachshund and eyes absent proteins form a complex and function synergistically to induce ectopic eye development in *Drosophila*. *Cell* **91**, 893-903.
- Cheyette, B. N. R., Green, P. J., Martin, K., Garren, H., Hartenstein, V. and Zipursky, S. L. (1994). The *Drosophila* sine oculis locus encodes a homeodomain-containing protein required for the development of the entire visual system. *Neuron* **12**, 977-996.
- Chotard, C., Leung, W. and Salecker, I. (2005). glial cells missing and gcm2 cell autonomously regulate both glial and neuronal development in the visual system of *Drosophila*. *Neuron* **48**, 237-251.
- Czerny, T., Halder, G., Kloter, U., Souabni, A., Gehring, W. J. and Busslinger, M. (1999). twin of eyeless, a second Pax-6 gene of *Drosophila*, acts upstream of eyeless in the control of eye development. *Mol. Cell* **3**, 297-307.
- Daniel, A., Dumstrei, K., Lengyel, J. A. and Hartenstein, V. (1999). The control of cell fate in the embryonic visual system by atonal, tailless and EGFR signaling. *Development* **126**, 2945-2954.
- Egger, B., Boone, J. Q., Stevens, N. R., Brand, A. H. and Doe, C. Q. (2007). Regulation of spindle orientation and neural stem cell fate in the *Drosophila* optic lobe. *Neural Dev.* **2**, 1.
- Ercilik, T., Hartenstein, V., McInnes, R. R. and Lipshitz, H. D. (2009). Eye evolution at high resolution: the neuron as a unit of homology. *Dev. Biol.* **332**, 70-79.
- Erickson, T., French, C. R. and Waskiewicz, A. J. (2010). Meis1 specifies positional information in the retina and tectum to organize the zebrafish visual system. *Neural Dev.* **5**, 22.
- Firth, L. C. and Baker, N. E. (2009). Retinal determination genes as targets and possible effectors of extracellular signals. *Dev. Biol.* **327**, 366-375.
- Fischbach, K. F. and Technau, G. (1984). Cell degeneration in the developing optic lobes of the sine oculis and small-optic-lobes mutants of *Drosophila melanogaster*. *Dev. Biol.* **104**, 219-239.
- Fu, W. and Baker, N. E. (2003). Deciphering synergistic and redundant roles of Hedgehog, Decapentaplegic and Delta that drive the wave of differentiation in *Drosophila* eye development. *Development* **130**, 5229-5239.
- Green, P., Hartenstein, A. Y. and Hartenstein, V. (1993). The embryonic development of the *Drosophila* visual system. *Cell Tissue Res.* **273**, 583-598.
- Greenwood, S. and Struhl, G. (1999). Progression of the morphogenetic furrow in the *Drosophila* eye: the roles of Hedgehog, Decapentaplegic and the Raf pathway. *Development* **126**, 5795-5808.
- Halder, G., Callaerts, P. and Gehring, W. J. (1995). Induction of ectopic eyes by targeted expression of the eyeless gene in *Drosophila*. *Science* **267**, 1788-1792.
- Hardie, R. C. (1985). *Functional Organization of the Fly Retina. Progress in Sensory Physiology*, Vol. 5. Berlin: Springer-Verlag.
- Hasegawa, E., Kitada, Y., Kaido, M., Takayama, R., Awasaki, T., Tabata, T. and Sato, M. (2011). Concentric zones, cell migration and neuronal circuits in the *Drosophila* visual center. *Development* **138**, 983-993.
- Heberlein, U., Wolff, T. and Rubin, G. M. (1993). The TGF beta homolog dpp and the segment polarity gene hedgehog are required for propagation of a morphogenetic wave in the *Drosophila* retina. *Cell* **75**, 913-926.
- Hofbauer, A. and Campos-Ortega, J. A. (1990). Proliferation pattern and early differentiation of the optic lobes in *Drosophila melanogaster*. *Roux Arch. Dev. Biol.* **198**, 264-274.
- Huang, Z. and Kunes, S. (1996). Hedgehog, transmitted along retinal axons, triggers neurogenesis in the developing visual centers of the *Drosophila* brain. *Cell* **86**, 411-422.
- Huang, Z., Shilo, B.-Z. and Kunes, S. (1998). A retinal axon fascicle uses spitz, an EGF receptor ligand, to construct a synaptic cartridge in the brain of *Drosophila*. *Cell* **95**, 693-703.
- Ikeda, K., Watanabe, Y., Ohto, H. and Kawakami, K. (2002). Molecular interaction and synergistic activation of a promoter by Six, Eya, and Dach proteins mediated through CREB binding protein. *Mol. Cell. Biol.* **22**, 6759-6766.
- Jacobsson, L., Kronhamn, J. and Rasmuson-Lestander, Å. (2009). The *Drosophila* Pax6 paralogs have different functions in head development but can partially substitute for each other. *Mol. Genet. Genomics* **282**, 217-231.
- Jemc, J. and Rebay, I. (2007). Identification of transcriptional targets of the dual-function transcription factor/phosphatase eyes absent. *Dev. Biol.* **310**, 416-429.
- Kaiser, R., Posteguillo, E. G., Müller, D. and Just, W. (2007). Exclusion of genes from the EYA-DACH-SIX-PAX pathway as candidates for Branchio-Oculo-Facial syndrome (BOFS). *Am. J. Med. Genet. A* **143A**, 2185-2188.
- Kim, S.-S., Zhang, R.-G., Braunstein, S. E., Joachimiak, A., Cvekl, A. and Hegde, R. S. (2002). Structure of the retinal determination protein Dachshund reveals a DNA binding motif. *Structure* **10**, 787-795.
- Kumar, J. P. (2010). Retinal determination: the beginning of eye development. *Curr. Top. Dev. Biol.* **93**, 1-28.
- Lee, T. and Luo, L. (2001). Mosaic analysis with a repressible cell marker (MARCM) for *Drosophila* neural development. *Trends Neurosci.* **24**, 251-254.
- Li, X., Oghi, K. A., Zhang, J., Krones, A., Bush, K. T., Glass, C. K., Nigam, S. K., Aggarwal, A. K., Maas, R., Rose, D. W. et al. (2003). Eya protein phosphatase activity regulates Six1-Dach-Eya transcriptional effects in mammalian organogenesis. *Nature* **426**, 247-254.
- Li, X., Erclik, T., Bertet, C., Chen, Z., Voutev, R., Venkatesh, S., Morante, J., Celik, A. and Desplan, C. (2013). Temporal patterning of *Drosophila* medulla neuroblasts controls neural fates. *Nature* **498**, 456-462.
- Lopes, C. S. and Casares, F. (2010). hth maintains the pool of eye progenitors and its downregulation by Dpp and Hh couples retinal fate acquisition with cell cycle exit. *Dev. Biol.* **339**, 78-88.
- Mardon, G., Solomon, N. M. and Rubin, G. M. (1994). dachshund encodes a nuclear protein required for normal eye and leg development in *Drosophila*. *Development* **120**, 3473-3486.
- Meinertzhagen, I. A. and Hanson, J. A. (1993). The development of the optic lobe. In *The Development of Drosophila melanogaster* (ed. M. Bate and A. Martinez-Arias), pp 1365-1389. New York: Cold Spring Harbor Laboratory Press.
- Morante, J., Erclik, T. and Desplan, C. (2011). Cell migration in *Drosophila* optic lobe neurons is controlled by eyeless/Pax6. *Development* **138**, 687-693.
- Morata, G. and Ripoll, P. (1975). Minutes: mutants of *drosophila* autonomously affecting cell division rate. *Dev. Biol.* **42**, 211-221.
- Motzny, C. K. and Holmgren, R. (1995). The *Drosophila* cubitus interruptus protein and its role in the wingless and hedgehog signal transduction pathways. *Mech. Dev.* **52**, 137-150.
- Pappu, K. S., Ostrin, E. J., Middlebrooks, B. W., Sili, B. T., Chen, R., Atkins, M. R., Gibbs, R. and Mardon, G. (2005). Dual regulation and redundant function of two eye-specific enhancers of the *Drosophila* retinal determination gene dachshund. *Development* **132**, 2895-2905.
- Peng, H. W., Slattery, M. and Mann, R. S. (2009). Transcription factor choice in the Hippo signaling pathway: homothorax and yorkie regulation of the microRNA bantam in the progenitor domain of the *Drosophila* eye imaginal disc. *Genes Dev.* **23**, 2307-2319.
- Pignoni, F., Hu, B., Zavitz, K. H., Xiao, J., Garrity, P. A. and Zipursky, S. L. (1997). The eye-specification proteins So and Eya form a complex and regulate multiple steps in *Drosophila* eye development. *Cell* **91**, 881-891.
- Purcell, P., Oliver, G., Mardon, G., Donner, A. L. and Maas, R. L. (2005). Pax6-dependence of Six3, Eya1 and Dach1 expression during lens and nasal placode induction. *Gene Expr. Patterns* **6**, 110-118.
- Reddy, B. V. V. G., Rauskolb, C. and Irvine, K. D. (2010). Influence of fat-hippo and notch signaling on the proliferation and differentiation of *Drosophila* optic neuroepithelia. *Development* **137**, 2397-2408.
- Sanes, J. R. and Zipursky, S. L. (2010). Design principles of insect and vertebrate visual systems. *Neuron* **66**, 15-36.
- Santos, J. S., Fonseca, N. A., Vieira, C. P., Vieira, J. and Casares, F. (2011). Phylogeny of the teashirt-related zinc finger (tshz) gene family and analysis of the developmental expression of tshz2 and tshz3b in the zebrafish. *Dev. Dyn.* **239**, 1010-1018.
- Selleck, S. B. and Steller, H. (1991). The influence of retinal innervation on neurogenesis in the first optic ganglion of *Drosophila*. *Neuron* **6**, 83-99.
- Serikaku, M. A. and O'Tousa, J. E. (1994). sine oculis is a homeobox gene required for *Drosophila* visual system development. *Genetics* **138**, 1137-1150.
- Silver, S. J. and Rebay, I. (2005). Signaling circuitries in development: insights from the retinal determination gene network. *Development* **132**, 3-13.
- Southall, T. D., Gold, K. S., Egger, B., Davidson, C. M., Caygill, E. E., Marshall, O. J. and Brand, A. H. (2013). Cell-type-specific profiling of gene expression and chromatin binding without cell isolation: assaying RNA Pol II occupancy in neural stem cells. *Dev. Cell* **26**, 101-112.
- Strausfeld, N. J. (2009). Brain organization and the origin of insects: an assessment. *Proc. Biol. Sci.* **276**, 1929-1937.
- Struhl, G. and Basler, K. (1993). Organizing activity of wingless protein in *Drosophila*. *Cell* **72**, 527-540.

- Suzuki, T., Kaido, M., Takayama, R. and Sato, M.** (2013). A temporal mechanism that produces neuronal diversity in the *Drosophila* visual center. *Dev. Biol.* **380**, 12-24.
- Umetsu, D., Murakami, S., Sato, M. and Tabata, T.** (2006). The highly ordered assembly of retinal axons and their synaptic partners is regulated by Hedgehog/Single-minded in the *Drosophila* visual system. *Development* **133**, 791-800.
- Wolff, T. and Ready, D. F.** (1991). The beginning of pattern formation in the *Drosophila* compound eye: the morphogenetic furrow and the second mitotic wave. *Development* **113**, 841-850.
- Xu, T. and Rubin, G. M.** (1993). Analysis of genetic mosaics in developing and adult *Drosophila* tissues. *Development* **117**, 1223-1237.
- Yasugi, T., Umetsu, D., Murakami, S., Sato, M. and Tabata, T.** (2008). *Drosophila* optic lobe neuroblasts triggered by a wave of proneural gene expression that is negatively regulated by JAK/STAT. *Development* **135**, 1471-1480.
- Yoshida, S., Soustelle, L., Giangrande, A., Umetsu, D., Murakami, S., Yasugi, T., Awasaki, T., Ito, K., Sato, M. and Tabata, T.** (2005). DPP signaling controls development of the lamina glia required for retinal axon targeting in the visual system of *Drosophila*. *Development* **132**, 4587-4598.
- Zhang, X., Friedman, A., Heaney, S., Purcell, P. and Maas, R. L.** (2002). Meis homeoproteins directly regulate Pax6 during vertebrate lens morphogenesis. *Genes Dev.* **16**, 2097-2107.
- Zhang, X., Rowan, S., Yue, Y., Heaney, S., Pan, Y., Brendolan, A., Selleri, L. and Maas, R. L.** (2006). Pax6 is regulated by Meis and Pbx homeoproteins during pancreatic development. *Dev. Biol.* **300**, 748-757.
